# Supplementary material
Source: MDPI journal article supplement (https://www.mdpi.com/2077-0472/12/9/1308)
Supplement: s1 [file s1]

**Table S1.** Trapping effort in 2018–2021 according to apple orchard age, intensity of agriculture, and control habitat type.

| Parameter                | Values           | Trapping Effort |
|--------------------------|------------------|-----------------|
| Orchard age              | old              | 14,268          |
|                          | medium           | 600             |
|                          | young            | 600             |
| Intensity of agriculture | high             | 9468            |
|                          | medium           | 4800            |
|                          | low              | 1200            |
| Control                  | forest           | 600             |
|                          | mowed meadow     | 6165            |
|                          | non-mowed meadow | 1200            |

**Table S2.** Numbers of small mammals trapped in commercial apple orchards and non-orchard habitats (mowed meadows, non-mowed meadows and forests) in 2018–2021, according to dietary groups.

| Group        | 2018    |             | 2019    |             | 2020    |             | 2021    |             |
|--------------|---------|-------------|---------|-------------|---------|-------------|---------|-------------|
|              | Orchard | Non-orchard | Orchard | Non-orchard | Orchard | Non-orchard | Orchard | Non-orchard |
| Insectivores | 5       | 8           | 1       | 13          | 1       | 1           | 1       | 3           |
| Herbivores   | 62      | 30          | 73      | 39          | 55      | 21          | 36      | 7           |
| Granivores   | 98      | 89          | 100     | 92          | 92      | 120         | 56      | 72          |
| Omnivores    | 38      | 22          | 33      | 23          | 10      | 22          | 17      | 30          |
| Total        | 203     | 149         | 207     | 167         | 158     | 164         | 110     | 112         |

**Table S3.** Changes of relative abundances of *C. glareolus* (individuals per 100 trap-days) in 2018–2021 irrespective of the habitat. N – number of trapping sessions; E – number of trapping sessions with no *C. glareolus* trapped.

| Year | N  | Summer |             |         | Autumn |             |         |
|------|----|--------|-------------|---------|--------|-------------|---------|
|      |    | E      | Avg ± SE    | Min–max | E      | Avg ± SE    | Min–max |
| 2018 | 14 | 11     | 0.95 ± 0.64 | 0–8.67  | 9      | 2.25 ± 1.22 | 0–15.33 |
| 2019 | 14 | 10     | 0.93 ± 0.54 | 0–7.33  | 9      | 1.90 ± 0.90 | 0–10.67 |
| 2020 | 18 | 13     | 0.63 ± 0.31 | 0–4.00  | 9      | 1.11 ± 0.37 | 0–5.33  |
| 2021 | 18 | 13     | 0.90 ± 0.46 | 0–6.67  | 10     | 1.44 ± 0.79 | 0–13.33 |

**Table S4.** Central positions and ranges of stable isotope ratios in the hair of adult *C. glareolus* males and females according to their reproductive status.

| Group                          | N  | $\delta^{13}\text{C}$ Values, ‰ |                     | $\delta^{15}\text{N}$ Values, ‰ |                 |
|--------------------------------|----|---------------------------------|---------------------|---------------------------------|-----------------|
|                                |    | Mean $\pm$ SE                   | Min–max             | Mean $\pm$ SE                   | Min–max         |
| Males, non breeding            | 7  | $-26.30 \pm 0.32$               | $-27.59$ – $-25.22$ | $5.30 \pm 0.85$                 | $1.94$ – $8.25$ |
| Males, weak spermatogenesis    | 4  | $-26.61 \pm 0.43$               | $-27.67$ – $-25.78$ | $6.60 \pm 0.56$                 | $5.59$ – $8.01$ |
| Males, strong spermatogenesis  | 10 | $-26.43 \pm 0.23$               | $-27.27$ – $-25.11$ | $5.96 \pm 0.41$                 | $3.65$ – $8.85$ |
| Females, inseminated           | 3  | $-27.71 \pm 0.31$               | $-28.31$ – $-27.26$ | $5.57 \pm 0.52$                 | $4.80$ – $6.57$ |
| Females, with embryos          | 5  | $-26.57 \pm 0.47$               | $-27.62$ – $-25.11$ | $5.88 \pm 0.53$                 | $3.95$ – $7.18$ |
| Females, bred successfully     | 9  | $-26.21 \pm 0.26$               | $-27.44$ – $-24.7$  | $6.37 \pm 0.32$                 | $5.30$ – $8.36$ |
| Females, bred not successfully | 6  | $-26.31 \pm 0.47$               | $-27.97$ – $-24.68$ | $5.99 \pm 0.75$                 | $3.30$ – $8.41$ |

**Table S5.** Pearson correlation coefficients of stable isotope values in the hair of *C. glareolus* with body mass (Q) and body condition index (BCI) of the individuals. Coefficients shown in bold are significant at  $p < 0.05$  or higher.

| Isotope               | Total        |       | In summer |              | In autumn |       | In apple orchards |       | Non-orchard habitats |       |
|-----------------------|--------------|-------|-----------|--------------|-----------|-------|-------------------|-------|----------------------|-------|
|                       | Q            | BCI   | Q         | BCI          | Q         | BCI   | Q                 | BCI   | Q                    | BCI   |
| $\delta^{13}\text{C}$ | <b>-0.20</b> | -0.17 | -0.17     | <b>-0.39</b> | -0.17     | -0.01 | <b>-0.32</b>      | -0.22 | -0.02                | -0.11 |
| $\delta^{15}\text{N}$ | -0.08        | -0.03 | -0.03     | -0.17        | -0.19     | -0.02 | -0.20             | -0.02 | -0.01                | -0.03 |

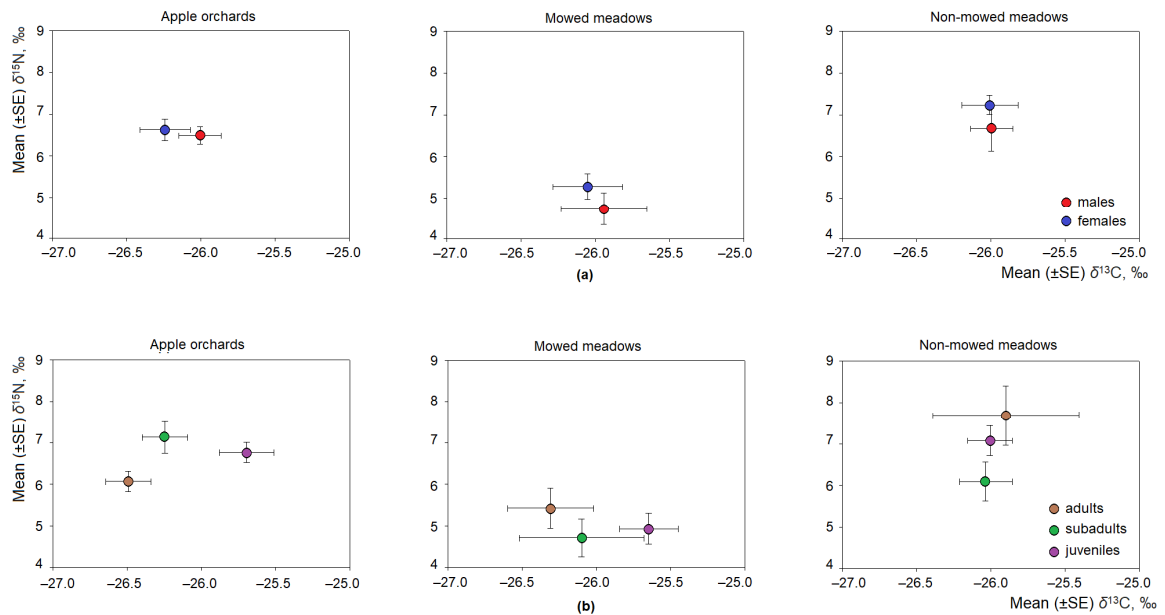

**Figure S1.** Intraspecific differences of the isotopic niches of *C. glareolus* in apple orchards, mowed and non-mowed meadows: (a) by gender, (b) by age.

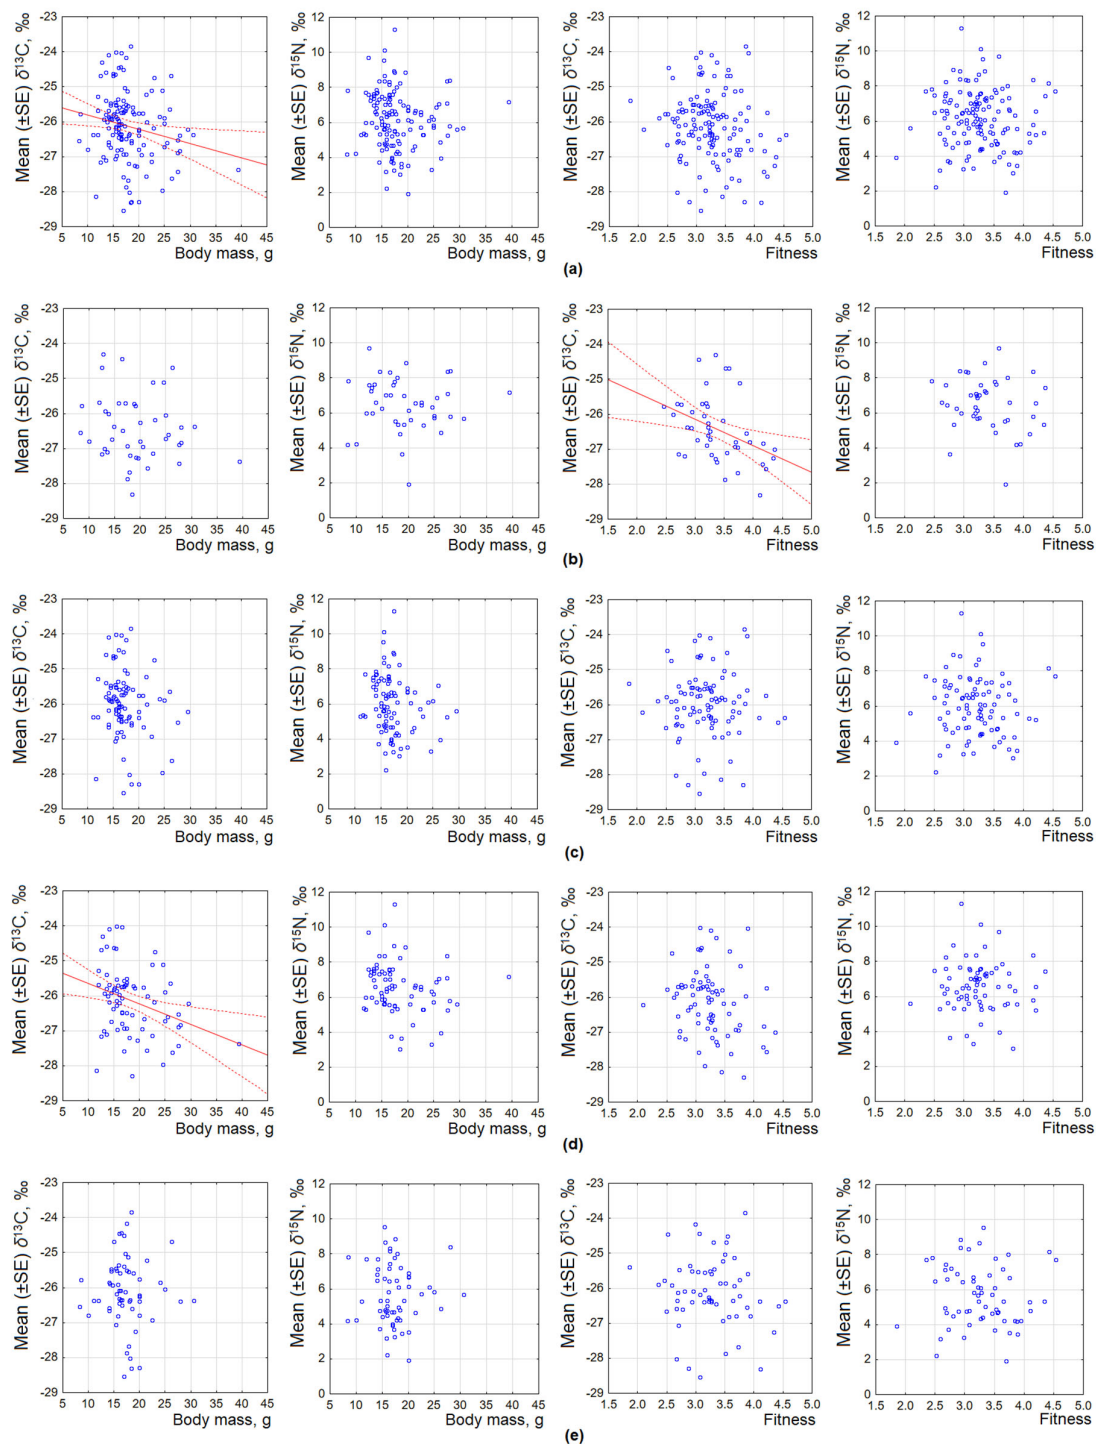

**Figure S2.** Correlation of *C. glareolus* body mass and body condition index as proxy of individual fitness with  $\delta^{13}\text{C}$  and  $\delta^{15}\text{N}$  values (significant regression line shown in red, 95% CI represented with dotted line) and distribution of the raw values of these parameters: (a) in general, (b) in summer, (c) in autumn, (d) in apple orchards, and (e) in surrounding meadows or forests.
